# Supplementary material
Source: publisher figshare collection journal article supplement (https://acs.figshare.com/ndownloader/files/8392127)
Supplement: Supplementary file 1 [file 8392127]

# Structural transformation of MnO<sub>2</sub> during the oxidation of bisphenol A

*Sarah Balgooyen,<sup>1</sup> Peter J. Alaimo,<sup>2</sup>*

*Christina K. Remucal,<sup>1, 3†</sup> and Matthew Ginder-Vogel,<sup>1,3\*</sup>*

<sup>1</sup>Environmental Chemistry and Technology Program

University of Wisconsin – Madison

Madison, Wisconsin

<sup>2</sup>Department of Chemistry

Seattle University

Seattle, Washington

<sup>3</sup>Department of Civil and Environmental Engineering

University of Wisconsin – Madison

Madison, Wisconsin

Submitted to: *Environmental Science and Technology*, November 22, 2016.

**Contents (27 pages): Figures: S1-S16, Tables: S1-S4**

† Corresponding author address: 660 N. Park St., Madison, WI 53706; e-mail: remucal@wisc.edu; telephone: (608) 262-1820; fax: (608) 262-0454; Twitter: @remucal.

\* Corresponding author address: 660 N. Park St., Madison, WI 53706; e-mail: mgindervogel@wisc.edu; telephone: (608) 262-0768; fax: (608) 262-0454; Twitter: @profmattgv.

|    |                                                     |            |
|----|-----------------------------------------------------|------------|
| 23 | <b>Table of Contents</b>                            |            |
| 24 |                                                     |            |
| 25 | <b>S1: Materials.....</b>                           | <b>S3</b>  |
| 26 | <b>S2: Analytical Methods.....</b>                  | <b>S5</b>  |
| 27 | <b>S3: Rate Constant Analysis .....</b>             | <b>S7</b>  |
| 28 | <b>S4: HCA Detection and Yield Calculation.....</b> | <b>S10</b> |
| 29 | <b>S5: Sorption Analysis .....</b>                  | <b>S17</b> |
| 30 | <b>S6: Solids Analysis .....</b>                    | <b>S17</b> |
| 31 |                                                     |            |
| 32 |                                                     |            |
| 33 |                                                     |            |
| 34 |                                                     |            |
| 35 |                                                     |            |
| 36 |                                                     |            |
| 37 |                                                     |            |
| 38 |                                                     |            |
| 39 |                                                     |            |
| 40 |                                                     |            |
| 41 |                                                     |            |
| 42 |                                                     |            |
| 43 |                                                     |            |
| 44 |                                                     |            |

## S1: Materials

Acetonitrile (HPLC grade), methanol (HPLC grade), formic acid (ACS, 88%), calcium chloride dihydrate (ACS, 100%), and potassium permanganate (ACS), were purchased from Fisher Chemical. Bisphenol A ( $\geq 99\%$ ) and L-ascorbic acid ( $\geq 99\%$ ) were purchased from Sigma-Aldrich. Manganese(II) nitrate tetrahydrate (analytical grade), piperazine-*N,N'*-bis(2-ethanesulfonic acid) (PIPES, 99%), and sodium oxalate (98.5%) were purchased from Acros Organics. Boron nitride (99.5%, 325 mesh) was purchased from Alfa Aesar. Sodium hydroxide (98%) was purchased from Sigma Chemical Co.

**Preparation of 4-Hydroxycumyl Alcohol (HCA).** This synthesis (Figure S1) is a modification of the method reported by Nakamura *et al.*,<sup>1</sup> and provides a significantly improved yield. A 100-mL round bottom flask charged with a teflon-coated stirbar was oven-dried overnight, fitted with a rubber septum, and cooled to room temperature under a stream of nitrogen gas. The flask was charged with *p*-acetoxyacetophenone (1.04 mL; 6.6 mmol) and dry Et<sub>2</sub>O (20 mL). The mixture was cooled to 0°C in an ice bath. A solution (3M in Et<sub>2</sub>O) of methylmagnesium iodide (7.0 mL; 21 mmol) was added dropwise over 5 min, resulting in formation of a yellow precipitate. The ice bath was removed and the mixture was allowed to warm to room temperature with stirring overnight. The reaction was opened up to air and quenched by the slow addition of aqueous ammonium chloride (saturated, 100 mL). The mixture was extracted using EtOAc (3 x 35 mL). The combined organic layers were washed with brine (35 mL), dried over MgSO<sub>4</sub>, and filtered. The volatile materials were removed *in vacuo* to afford a pink-colored residue. The product was crystallized from hot EtOAc to give 4-hydroxycumyl alcohol (924 mg; 6.07 mmol; 92 % yield) as a white powder.

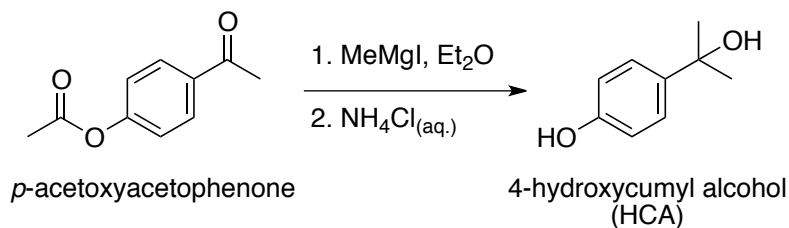

**Figure S1.** Synthesis reaction of HCA.

$^1\text{H}$  NMR (400 MHz,  $\text{CD}_3\text{OD}$ ):  $\delta$  7.28 (d,  $J$  = 8 Hz, 2H), 6.71 (d,  $J$  = 8 Hz, 2H), 1.48 (s, 6H) ppm. This matches the literature characterization.<sup>1</sup>

$^{13}\text{C}$  NMR (100 MHz,  $\text{CD}_3\text{OD}$ ):  $\delta$  156.8, 141.7, 127.0, 115.4, 72.7, 31.9 ppm.

IR (KBr pellet):  $\nu$  3394, 3128, 2971, 2682, 2592, 2499, 1890, 1612, 1597, 1516, 1466, 1448, 1397, 1379, 1303, 1239, 1179, 1160, 1111, 1102, 1016, 956, 935, 861  $\text{cm}^{-1}$ .

LRMS (Agilent 6460 triple quadrupole, electrospray ionization, negative mode) calculated  $m/z$  for  $\text{C}_9\text{H}_{12}\text{O}_2$ : 152.08; found  $m/z$  151.10  $[\text{M}-\text{H}]^-$ , 133.10  $[\text{M}-\text{H}_3\text{O}]^-$  (Figure S2). This matches the literature characterization.<sup>2</sup>

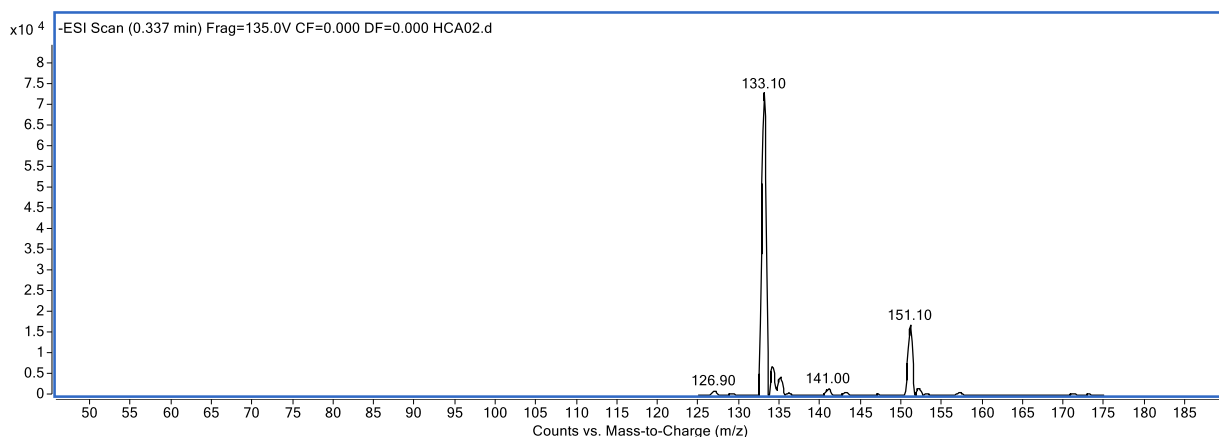

**Figure S2.** Mass spectrum of synthesized HCA collected using an Agilent triple quadrupole LC-MS with electrospray ionization in negative mode. Molecular ion = 151.10; base peak = 133.10.

## 81 S2: Analytical Methods

82 **High Performance Liquid Chromatography (HPLC) Analysis.** HPLC analyses were  
83 performed with an Agilent 1260 instrument equipped with a fluorescence detector (Model 1260  
84 FLD) and a UV detector (Model 1260 DAD). The peaks detected in experimental  
85 chromatograms were compared to authentic standards.

86 Column: Agilent Poroshell 120 EC-C18 (4.6 x 50 mm, 2.7 µm)  
87 Guard column: Agilent EC-C18 (3.0 x 5 mm, 2.7 µm)  
88 Injection volume: 5 µL  
89 Mobile phase: A: 0.1% Formic Acid + 10% Acetonitrile (ACN) in Milli-Q water  
90 adjusted to pH 3 (filtered through a 0.2 µm nylon filter)  
91 B: 100% ACN  
92 Flowrate: 0.6 mL/min  
93 Column temperature: 30°C  
94 Isocratic: % Solvent A % Solvent B  
95 60 40  
96 Method duration: 6.00 min  
97

| Target Analyte | Excitation Wavelength<br>(nm) | Emission Wavelength<br>(nm) | Retention Time<br>(min) |
|----------------|-------------------------------|-----------------------------|-------------------------|
| BPA            | 280                           | 310                         | 2.65                    |
| HCA            | 280                           | 310                         | 0.66                    |

98

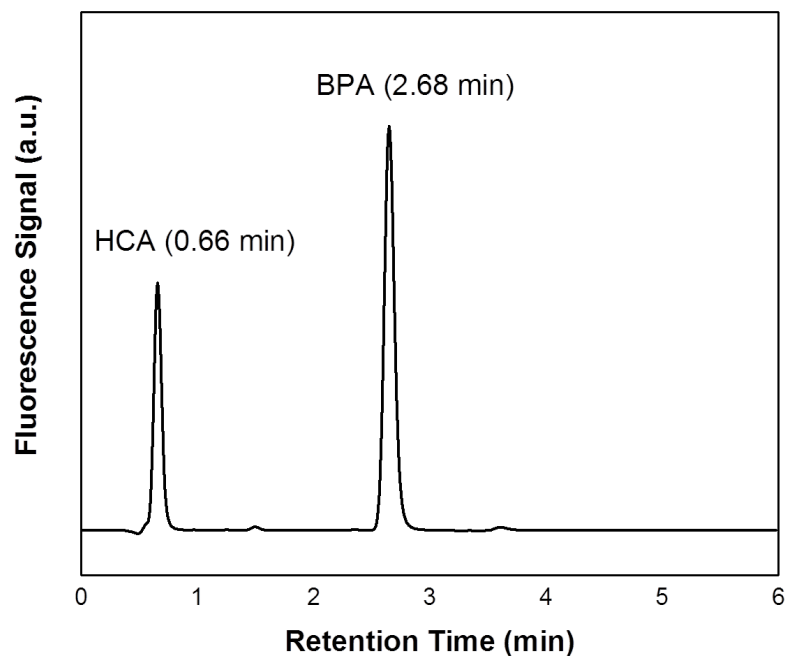

**Figure S3.** HPLC chromatogram of a sample from the 12-addition experiment of 80  $\mu\text{M}$  BPA with 0.33 g/L Mn(III)-rich  $\delta\text{-MnO}_2$  in PIPES buffer (pH 7).

### **Inductively Coupled Plasma-Optical Emission Spectroscopy (ICP-OES) Analysis.**

ICP-OES analyses were performed on a PerkinElmer Optima 4300 DV to quantify aqueous manganese in the reactors at various time intervals. All samples were filtered immediately and diluted in a solution of 2% nitric acid. Standards were made from a SPEX CertiPrep 1000 mg/L Mn stock diluted in 2% nitric acid. Error was calculated using relative standard deviations from four instrument responses.

### S3: Rate Constant Analysis

Rate constants for the oxidation of BPA and HCA by Mn oxides were calculated assuming pseudo-first-order kinetics according to:

$$\ln[A] = -kt + \ln[A]_0 \quad \text{S1}$$

where  $A$  is the concentration of the organic (M),  $t$  is the time of the reaction (min), and  $k$  is the rate constant ( $\text{min}^{-1}$ ). Since the reaction deviates from pseudo-first-order kinetics after long reaction durations, only data from the linear portion of these plots were used to calculate rate constants ( $R^2 \geq 0.98$  for the first 4 additions,  $R^2 \geq 0.90$  for additions 5-12). Reported rate constants are averages of rate constants calculated at multiple time points. For example, the data in Figure S4a would be used to calculate an average rate constant by using the rate constant in the first two minutes, the first three minutes, and the first four minutes. This method was used in order to provide an average and standard deviation of the rate constant throughout each reaction of BPA with  $\text{MnO}_2$ . As shown in Figure S4b, the data deviates from pseudo-first-order regime after a certain time point, and these later time points are not used in rate constant calculations or error determination. The error for each rate constant is the standard deviation of the rate constants collected at all useable time points. Half-lives ( $t_{1/2}$ ) were calculated using equation S2:

$$t_{1/2} = \frac{\ln(2)}{k} \quad \text{S2}$$

The reaction length of each addition was based on estimation to capture as much of the degradation process as possible. The first several reactions were designed to allow enough time to oxidize the entire aliquot of BPA.

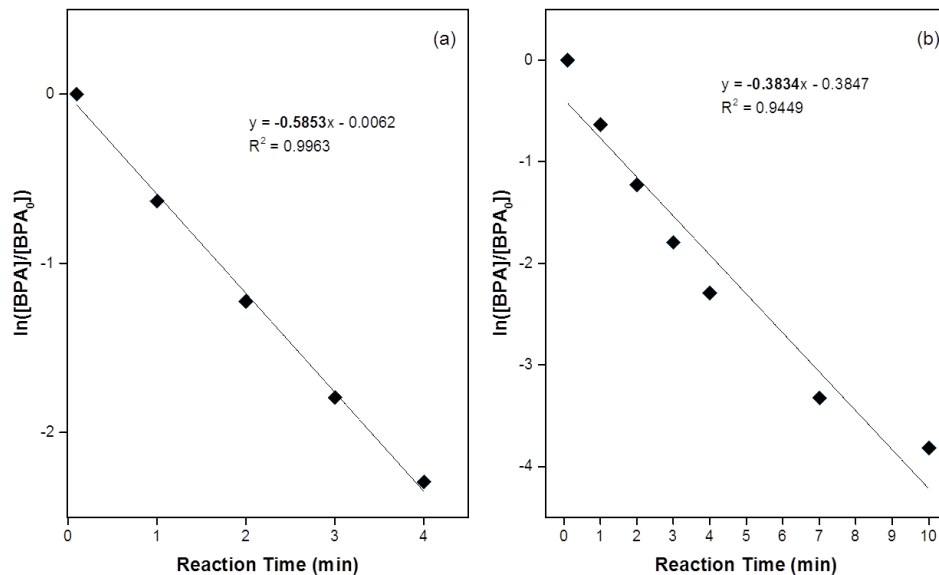

**Figure S4.** Pseudo-first-order rate analysis of (a) the first four minutes and (b) the first ten minutes of 80  $\mu$ M BPA oxidation by 0.33 g/L Mn(III)-rich  $\delta$ -MnO<sub>2</sub> in PIPES pH 7.



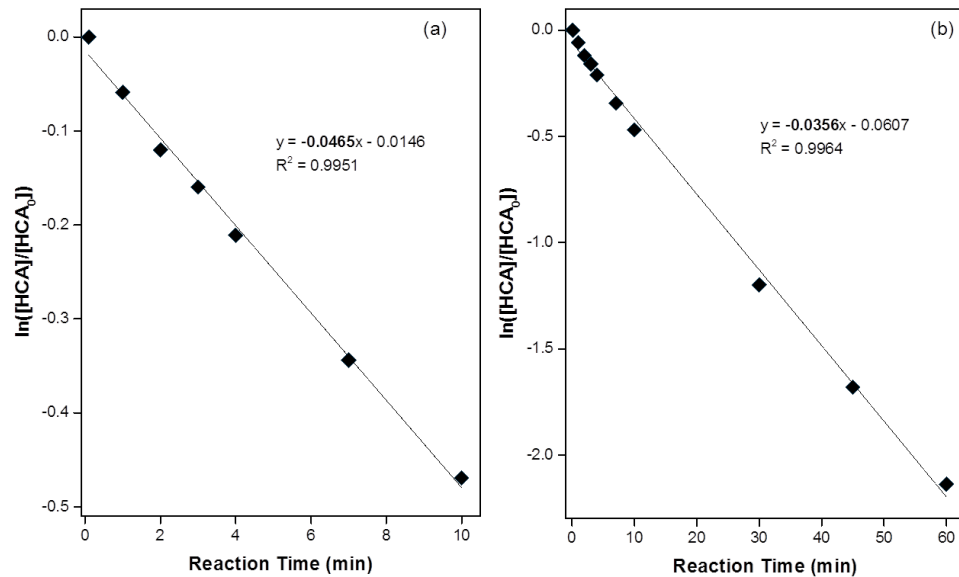

**Figure S5.** Pseudo-first-order rate analysis of (a) the first 10 minutes and (b) the first 60 minutes of 80  $\mu$ M HCA oxidation by 0.33 g/L Mn(III)-rich  $\delta$ -MnO<sub>2</sub> in PIPES pH 7.

#### 157 S4: HCA Detection and Yield Calculation

158 **HCA Identification.** The oxidation product in this reaction was identified as HCA by  
159 comparing its UV spectrum and HPLC retention time to pure HCA synthesized as described in  
160 Section S1. The UV spectra of the BPA product aligned with that of the synthesized HCA, with  
161  $\lambda_{\text{max}}$  of both compounds occurring at 221 nm and 260 nm (Figure S6). The molar extinction  
162 coefficient of HCA at 221 nm is  $7173.5 \text{ M}^{-1} \text{ cm}^{-1}$  at pH 7. The retention times of both the  
163 authentic standard and the oxidation product were at 0.657 min using the HPLC method  
164 described in Section S2 (Figure S7).

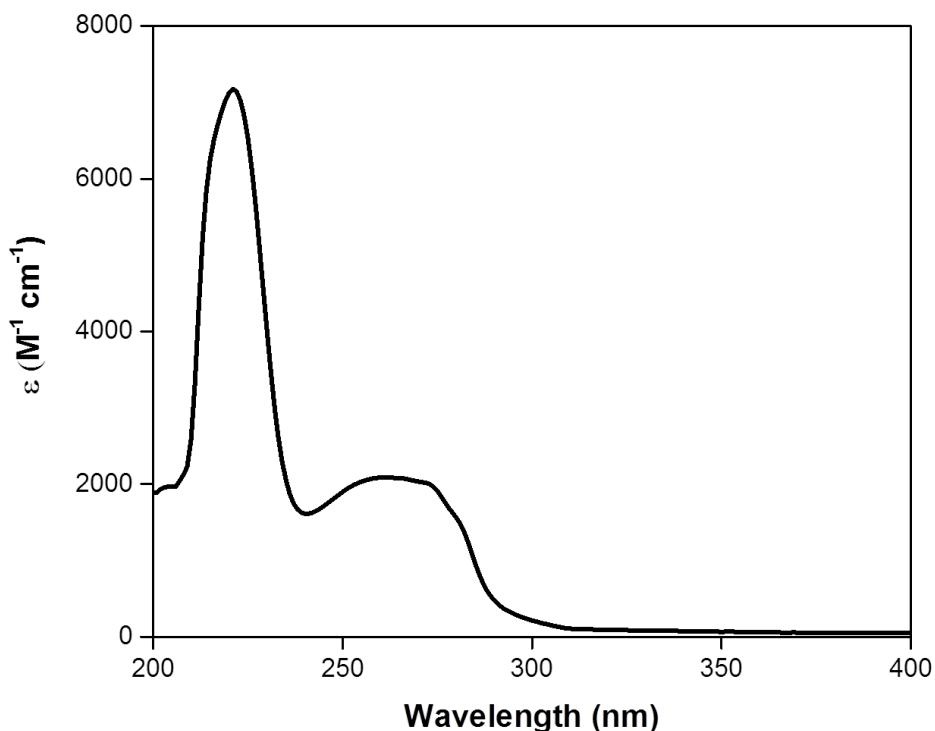

165

166 **Figure S6.** UV spectrum of the synthesized HCA at pH 7.

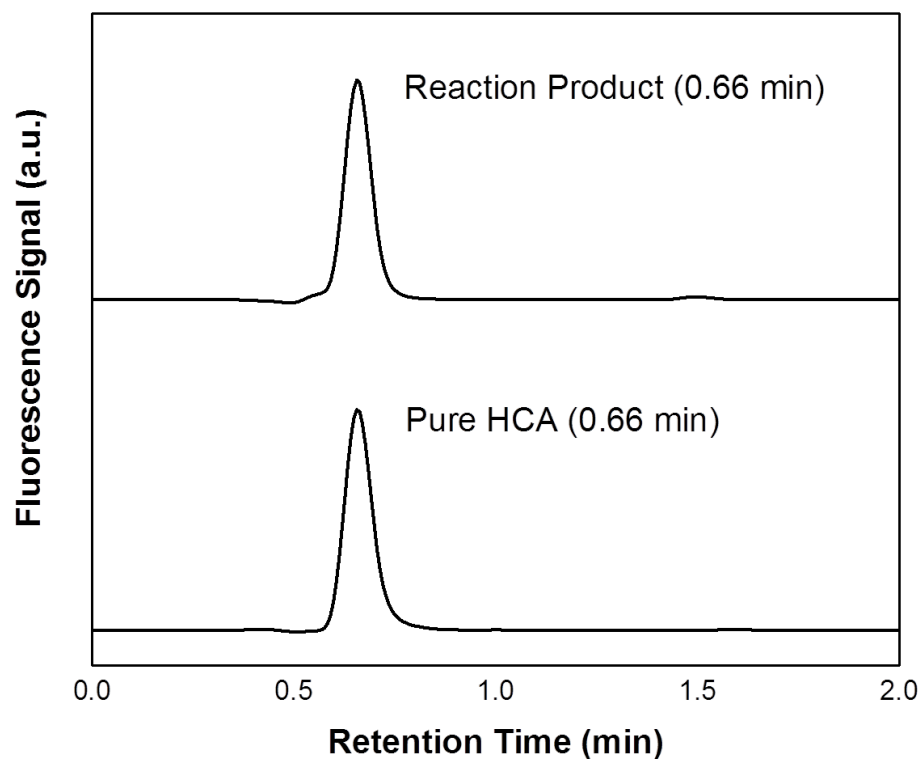

**Figure S7.** HPLC chromatograms of the synthesized HCA and reaction products, measured using a fluorescence detector.

**HCA Quantification.** The rate of change of BPA with time was modeled by assuming pseudo-first-order kinetics according to:

$$\frac{d[\text{BPA}]}{dt} = -k_1[\text{BPA}] \quad \text{S3}$$

where [BPA] is the concentration of BPA at time  $t$  and  $k_1$  is the measured pseudo-first-order loss rate of BPA. This differential expression integrates to:

$$[\text{BPA}] = [\text{BPA}]_0 e^{-k_1 t} \quad \text{S4}$$

177 where  $[\text{BPA}]_0$  is the initial concentration of BPA.

178 The differential expression describing the change in HCA concentration with time is  
179 given by:

$$180 \quad \frac{d[\text{HCA}]}{dt} = k_1 F_{\text{HCA}} [\text{BPA}] - k_2 [\text{HCA}] \quad \text{S5}$$

181 where  $[\text{HCA}]$  is the concentration of HCA at time  $t$  and  $F_{\text{HCA}}$  is the yield of HCA from BPA  
182 oxidation.  $k_2$  is the pseudo-first-order loss rate of HCA, which is assumed to be 12.6 times  
183 slower than  $k_1$  based on control experiments (Figures S4 and S5). Equation S5 can then be  
184 integrated to give an expression of the form:

$$185 \quad [\text{HCA}] = \frac{k_1 F_{\text{HCA}} [\text{BPA}]_0}{k_1 - k_2} (e^{-k_1 t} - e^{-k_2 t}) \quad \text{S6}$$

186  $F_{\text{HCA}}$  is then determined by fitting the measured HCA concentrations according to equation S6,  
187 which is identical to equation 1 in the manuscript.

188

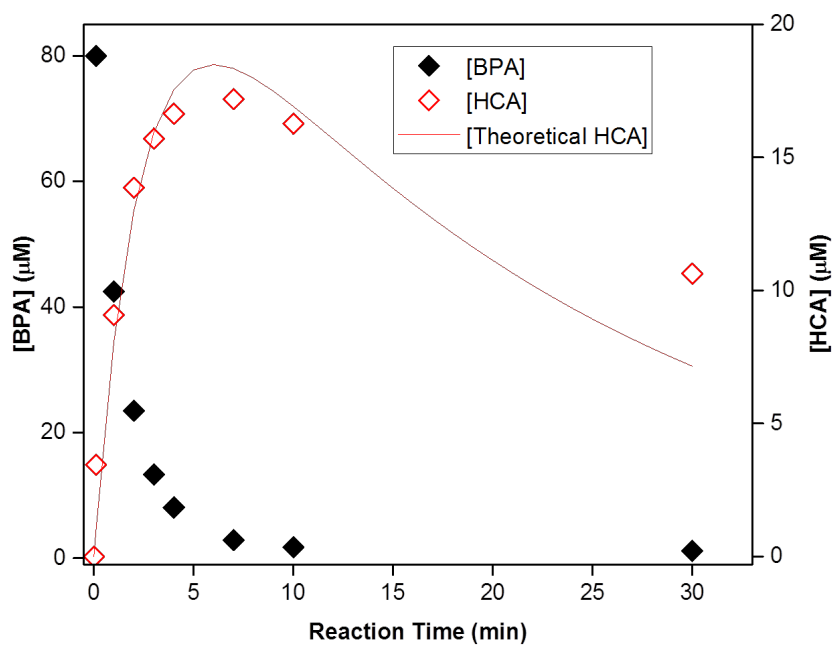

**Figure S8.** A sample single-addition batch reaction of 80  $\mu\text{M}$  BPA with 0.33 g/L Mn(III)-rich  $\delta\text{-MnO}_2$  in PIPES pH 7 buffer. Theoretical HCA production is modeled using a least-squares minimization with Equation 1 in the manuscript and the measured data set.

**Table S1.** Percentages of BPA recovered as HCA on a molar basis during each of the twelve additions of 80  $\mu\text{M}$  BPA to 0.33 g/L Mn(III)-rich  $\delta\text{-MnO}_2$ , calculated using Equation 1.

| Additions of BPA | HCA Yield (% of BPA) |
|------------------|----------------------|
| 1                | 39.73                |
| 2                | 42.31                |
| 3                | 35.63                |
| 4                | 21.33                |
| 5                | 17.80                |
| 6                | 5.63                 |
| 7                | 2.63                 |
| 8                | 2.98                 |
| 9                | 2.42                 |
| 10               | 3.58                 |
| 11               | 1.86                 |
| 12               | 3.54                 |

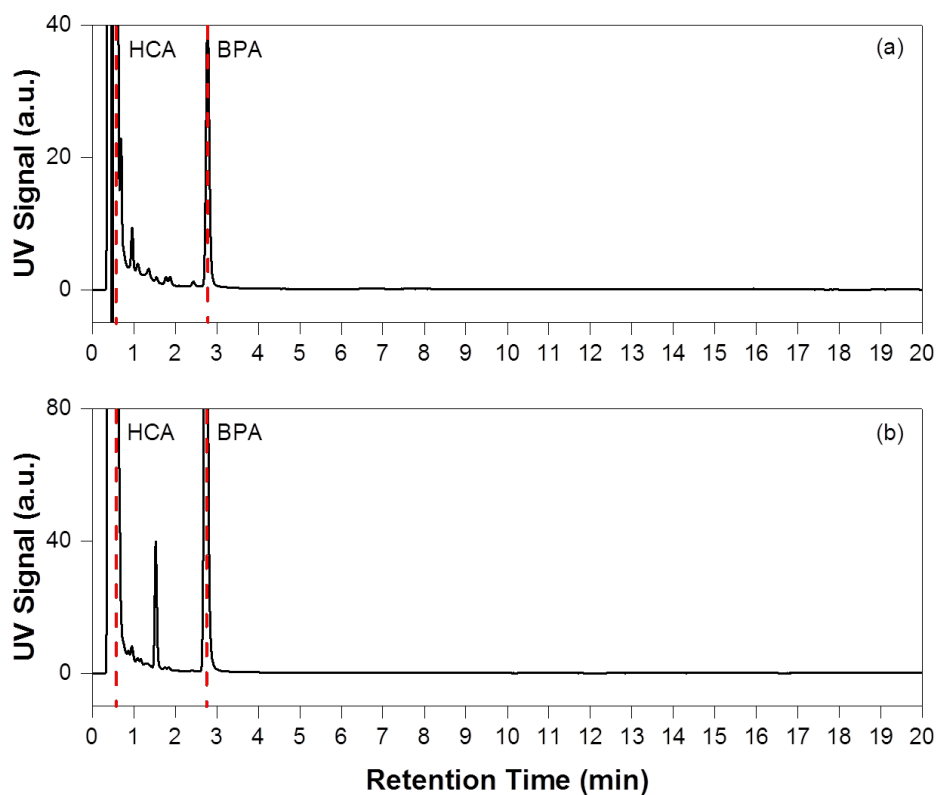

214

215 **Figure S9.** HPLC chromatograms using a DAD detector (230 nm) from (a) the first minute of  
 216 the first addition, and (b) the last minute of the twelfth addition during twelve additions of 80  $\mu$ M  
 217 BPA with 0.33 g/L Mn(III)-rich  $\delta$ -MnO<sub>2</sub> in PIPES pH 7 buffer.

218

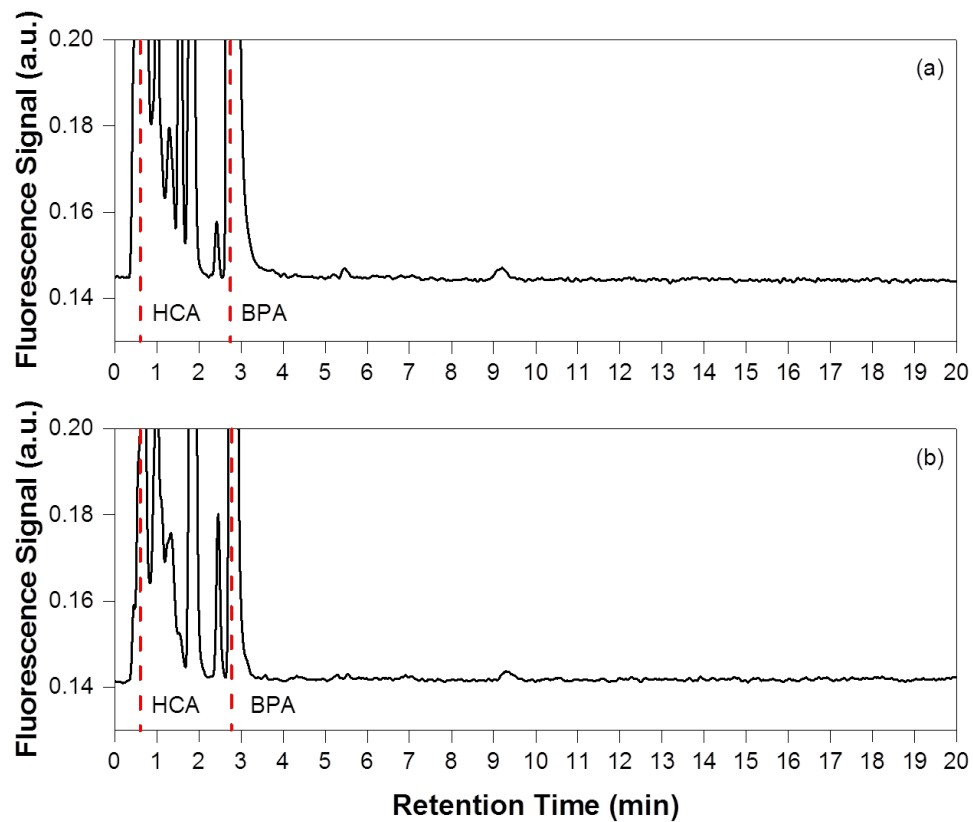

**Figure S10.** HPLC chromatograms using an FLD detector from (a) the first minute of the first addition, and (b) the last minute of the twelfth addition during twelve additions of 80  $\mu$ M BPA with 0.33 g/L Mn(III)-rich  $\delta$ -MnO<sub>2</sub> in PIPES pH 7 buffer.



230 **S5: Sorption Analysis**

231 **Table S2.** The percentages of BPA and HCA sorbed during three sequential additions of 80  $\mu\text{M}$   
 232 BPA to 0.33 g/L Mn(III)-rich  $\delta\text{-MnO}_2$  in PIPES pH 7 buffer. All reactions were 60 minutes in duration.

| BPA Addition       |                |               |
|--------------------|----------------|---------------|
| # of BPA Additions | % BPA Sorbed   | % HCA Sorbed  |
| 1                  | $14.3 \pm 7.4$ | $0 \pm 0$     |
| 2                  | $0 \pm 0$      | $0.9 \pm 1.4$ |
| 3                  | $0.2 \pm 0.5$  | $1.0 \pm 0.9$ |

233

234

235

236

237 **S6: Solids Analysis**

238 **Table S3.** BET analysis of surface area in a subset of solids collected after each addition.

239

| Surface Analysis   |                                        |
|--------------------|----------------------------------------|
| # of BPA Additions | Surface Area ( $\text{m}^2/\text{g}$ ) |
| 0                  | $118 \pm 15$                           |
| 3                  | $100 \pm 15$                           |
| 6                  | $106 \pm 15$                           |
| 9                  | $124 \pm 15$                           |

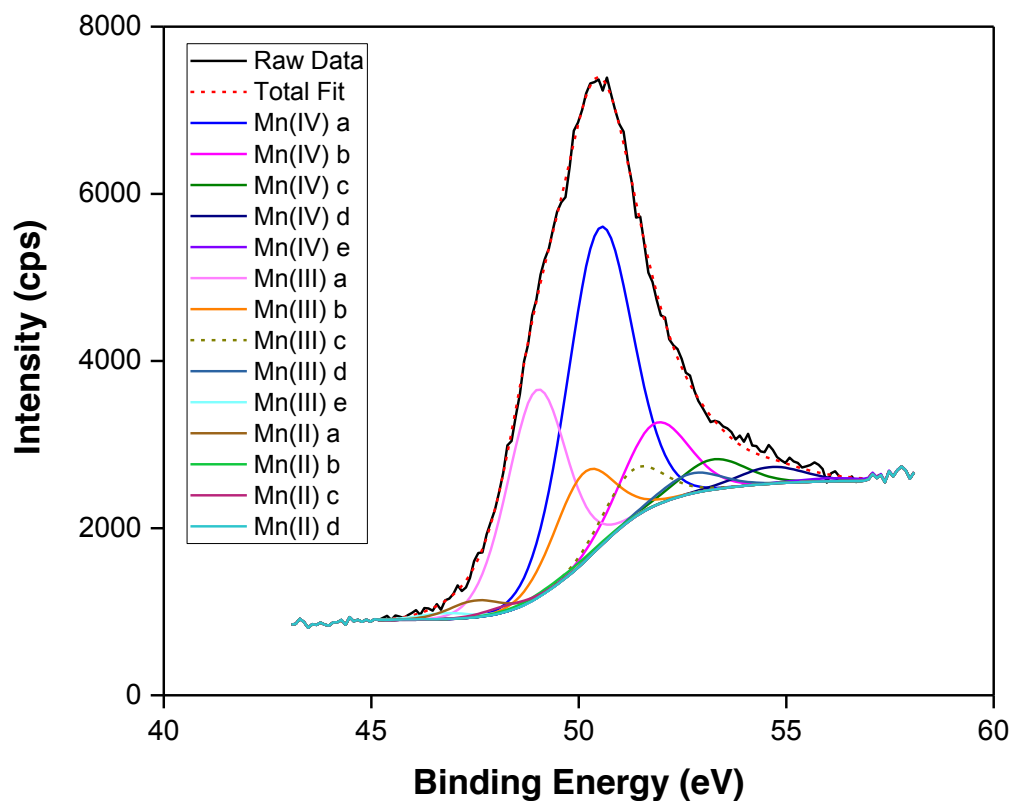

240

241 **Figure S11.** Fitted XPS data from the starting material using the method described in the Materials and  
 242 Methods section of the manuscript. Uncertainty in the mole fraction is  $\pm 0.02$  for Mn(IV) and Mn(III) and  
 243  $\pm 0.01$  for Mn(II).

244

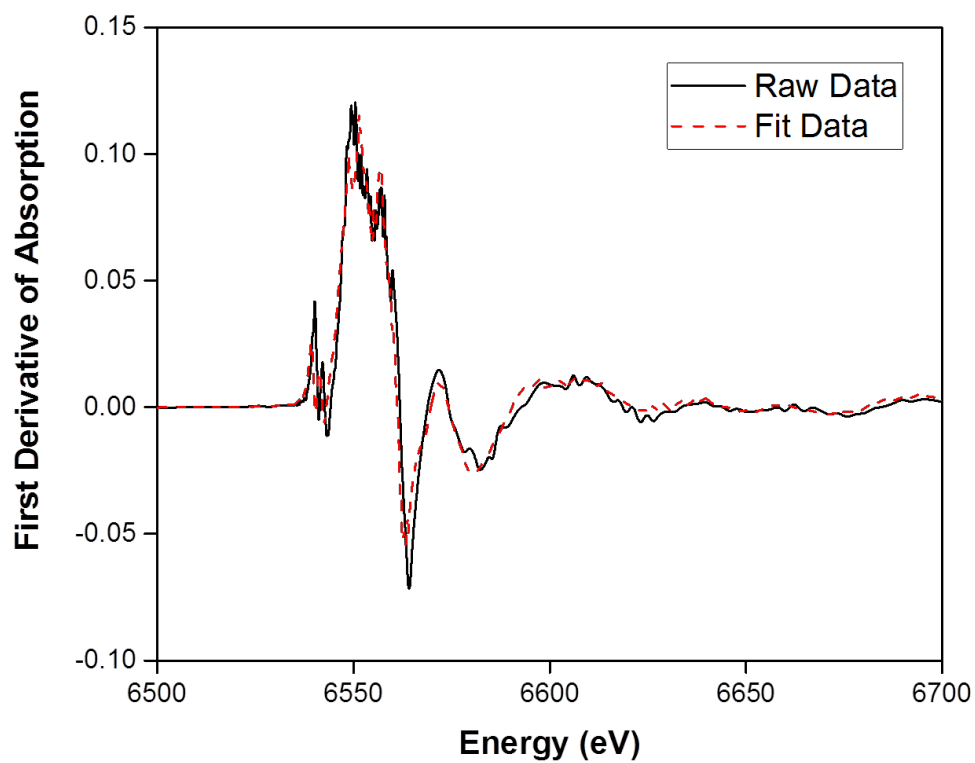

245

246 **Figure S12.** Fitted XANES data from the starting material using the Combo method described in the

247 Methods and Materials section of the manuscript.

248

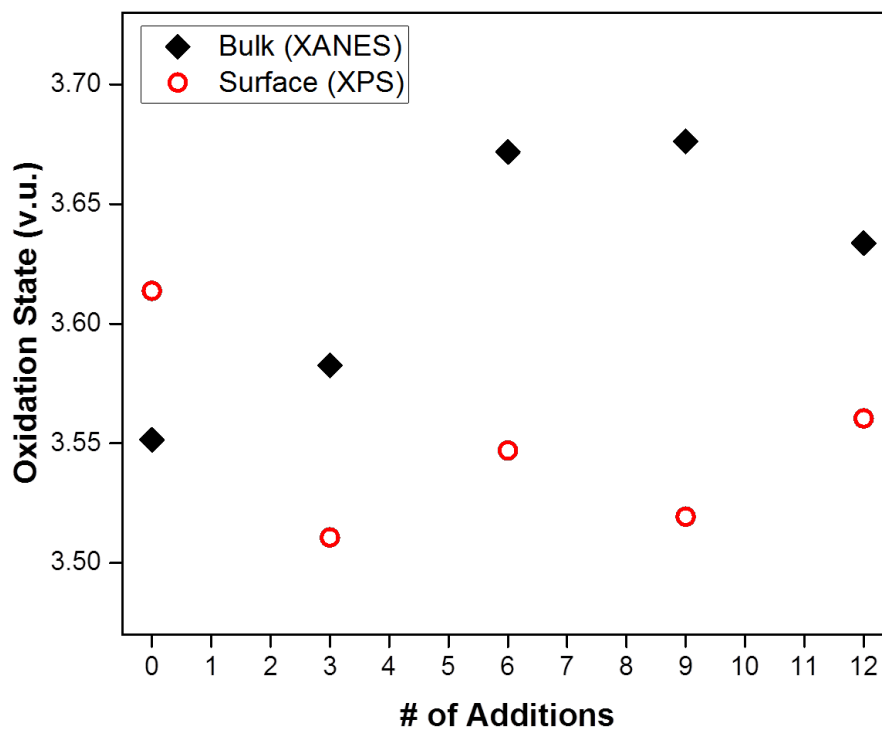

**Figure S13.** Oxidation state (measured by XANES and XPS) of a subset of solid samples over twelve additions of 80  $\mu\text{M}$  BPA with 0.33 g/L of Mn(III)-rich  $\delta\text{-MnO}_2$  in a PIPES pH 7 buffer. Data is an average of two reactors.

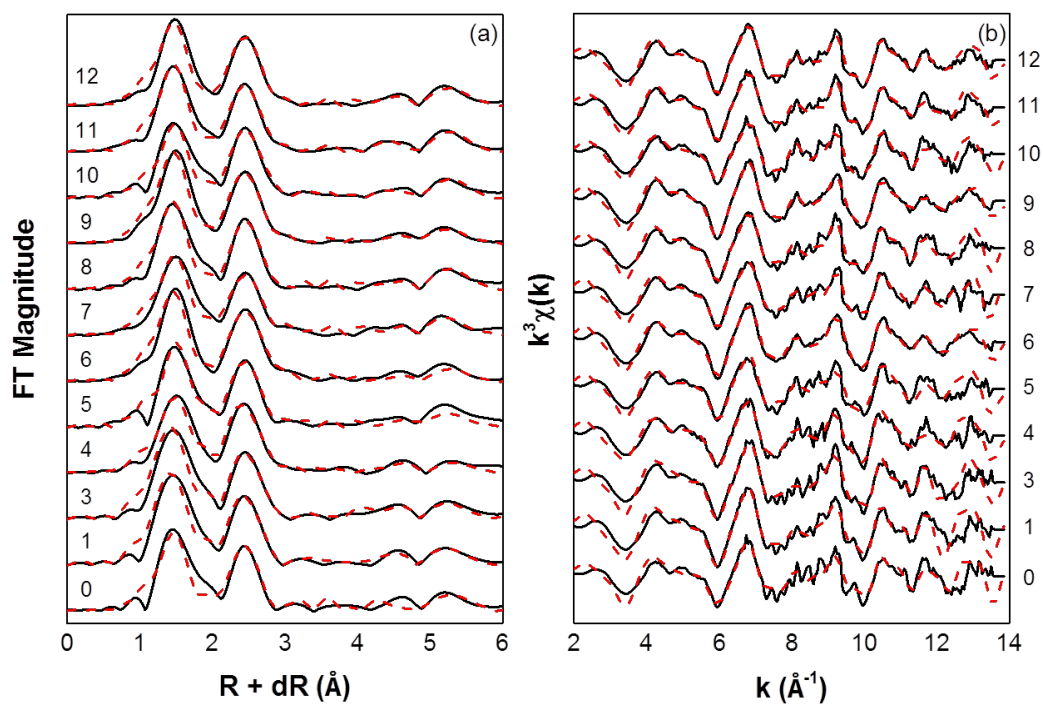

257  
 258 **Figure S14.** Raw and modeled data of (a) the chi functions and (b) relative radial distribution function  
 259 from EXAFS analysis of solids over twelve additions of 80  $\mu$ M BPA with 0.33 g/L of Mn(III)-rich  $\delta$ -  
 260  $\text{MnO}_2$  in a PIPES pH 7 buffer. The addition number is indicated by the numbers next to each data set.  
 261 Samples from both reactors were combined and then analyzed.

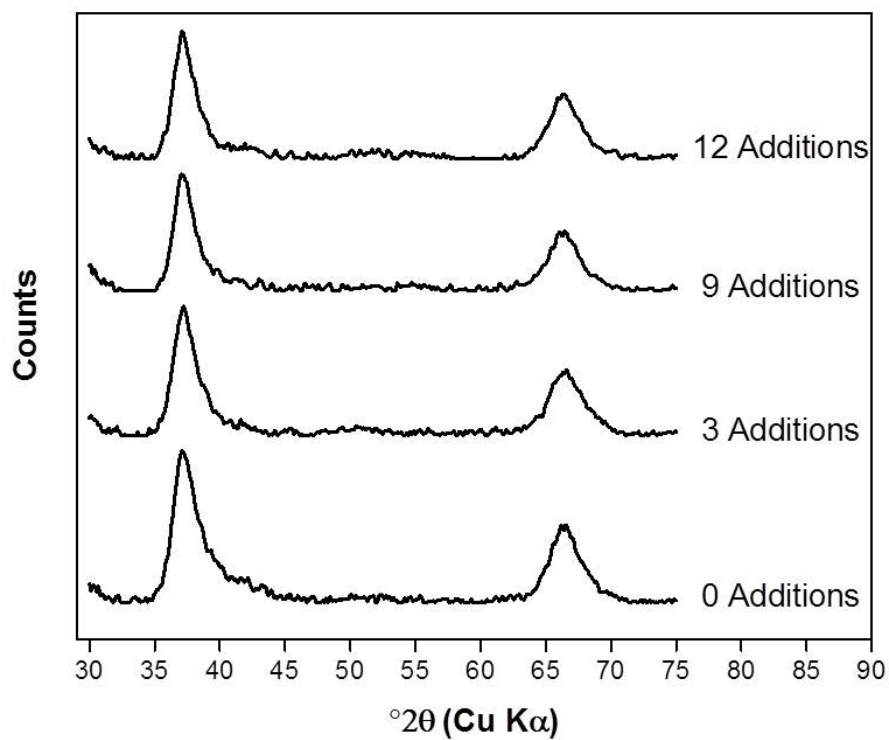

**Figure S15.** The crystallinity of Mn(III)-rich  $\delta$ -MnO<sub>2</sub> during twelve additions of 80  $\mu$ M BPA to 0.33 g/L Mn(III)-rich  $\delta$ -MnO<sub>2</sub> in PIPES buffer (pH 7), as measured by XRD.

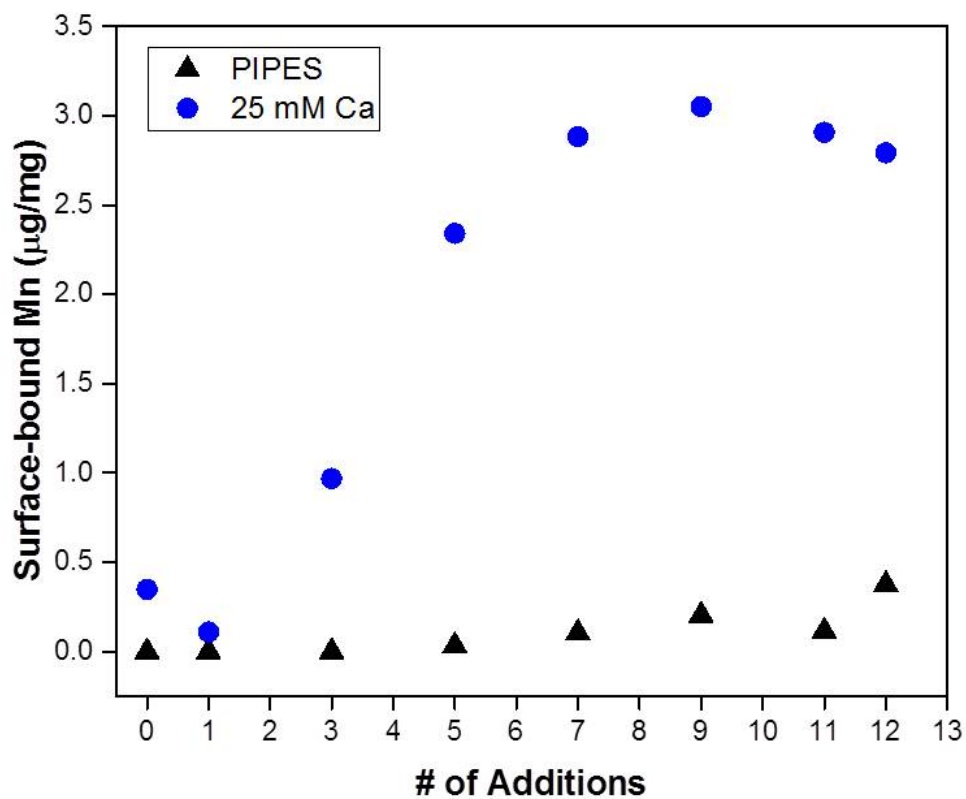

**Figure S16.** Surface-bound Mn extractable by a solution of 25 mM  $\text{CaCl}_2$  on a Mn(III)-rich  $\delta\text{-MnO}_2$  during twelve additions of 80  $\mu\text{M}$  BPA to 0.33 g/L Mn(III)-rich  $\delta\text{-MnO}_2$  in PIPES buffer (pH 7).

271 **Table S4.** EXAFS fitting results. The  $S_0^2$  parameter was set to 0.865 for all samples.

| <u>Sample</u> | <u>e0</u> | <u>focc</u> | <u>S02</u> | <u>χ2</u> | <u>Shell</u> | <u>CN</u> | <u>Dist (Å)</u> | <u>σ2</u> |
|---------------|-----------|-------------|------------|-----------|--------------|-----------|-----------------|-----------|
| 0 Additions   | 6.36      | 0.6(1)      | 0.66       | 621       | Mn-O         | 4         | 1.89(5)         | 0.009(6)  |
|               |           |             |            |           | Mn-O         | 2         | 1.90(4)         | 0.002(4)  |
|               |           |             |            |           | Mn-Mn        | 2         | 2.71(4)         | 0.006(4)  |
|               |           |             |            |           | Mn-Mn        | 4         | 2.85(1)         | 0.002(2)  |
|               |           |             |            |           | Mn-O         | 4         | 3.30(4)         | 0.001(4)  |
|               |           |             |            |           | Mn-O         | 2         | 3.48(9)         | 0.001(4)  |
|               |           |             |            |           | Mn-Na inter  | 2(4)      | 4.2(2)          | 0.005     |
|               |           |             |            |           | Mn-O         | 4         | 4.5(1)          | 0.001(7)  |
|               |           |             |            |           | Mn-O         | 8         | 4.69(8)         | 0.001(7)  |
|               |           |             |            |           | Mn-Mn        | 4         | 4.92(8)         | 0.003(2)  |
|               |           |             |            |           | Mn-Mn        | 2         | 5.0(1)          | 0.003(2)  |
|               |           |             |            |           | Mn-Mn        | 2         | 5.59(9)         | 0.002(3)  |
|               |           |             |            |           | Mn-Mn        | 4         | 5.83(5)         | 0.002(3)  |
|               |           |             |            |           |              |           |                 |           |
| <u>Sample</u> | <u>e0</u> | <u>focc</u> | <u>S02</u> | <u>χ2</u> | <u>Shell</u> | <u>CN</u> | <u>Dist (Å)</u> | <u>σ2</u> |
| 1 Additions   | 5.39      | 0.9(1)      | 0.66       | 779       | Mn-O         | 4         | 1.87(6)         | 0.005(7)  |
|               |           |             |            |           | Mn-O         | 2         | 1.9(1)          | 0.002(1)  |
|               |           |             |            |           | Mn-Mn        | 2         | 2.71(2)         | 0.005(1)  |
|               |           |             |            |           | Mn-Mn        | 4         | 2.86 (1)        | 0.002(1)  |
|               |           |             |            |           | Mn-O         | 4         | 3.35(4)         | 0.004(5)  |
|               |           |             |            |           | Mn-O         | 2         | 3.6(1)          | 0.004(5)  |
|               |           |             |            |           | Mn-Na inter  | 2(3)      | 4.1(2)          | 0.005     |
|               |           |             |            |           | Mn-O         | 4         | 4.4(1)          | 0.002(7)  |
|               |           |             |            |           | Mn-O         | 8         | 4.65(5)         | 0.002(7)  |
|               |           |             |            |           | Mn-Mn        | 4         | 4.89(4)         | 0.001(2)  |
|               |           |             |            |           | Mn-Mn        | 2         | 5.03(7)         | 0.001(2)  |
|               |           |             |            |           | Mn-Mn        | 2         | 5.72(8)         | 0.002     |
|               |           |             |            |           | Mn-Mn        | 4         | 5.82(4)         | 0.002     |
|               |           |             |            |           |              |           |                 |           |
| <u>Sample</u> | <u>e0</u> | <u>focc</u> | <u>S02</u> | <u>χ2</u> | <u>Shell</u> | <u>CN</u> | <u>Dist (Å)</u> | <u>σ2</u> |
| 3 Additions   | 5.23      | 0.9(1)      | 0.66       | 423       | Mn-O         | 4         | 1.87(6)         | 0.005(6)  |
|               |           |             |            |           | Mn-O         | 2         | 1.9(1)          | 0.002(1)  |
|               |           |             |            |           | Mn-Mn        | 2         | 2.69(1)         | 0.005(2)  |
|               |           |             |            |           | Mn-Mn        | 4         | 2.85(1)         | 0.003(1)  |
|               |           |             |            |           | Mn-O         | 4         | 3.33(5)         | 0.006(6)  |
|               |           |             |            |           | Mn-O         | 2         | 3.6(1)          | 0.006(6)  |
|               |           |             |            |           | Mn-Na inter  | 0(2)      | 4.0(6)          | 0.005     |
|               |           |             |            |           | Mn-O         | 4         | 4.5(1)          | 0.005(1)  |
|               |           |             |            |           | Mn-O         | 8         | 4.68(9)         | 0.005(1)  |
|               |           |             |            |           | Mn-Mn        | 4         | 4.89(2)         | 0.002(2)  |
|               |           |             |            |           | Mn-Mn        | 2         | 5.00(4)         | 0.002(2)  |
|               |           |             |            |           | Mn-Mn        | 2         | 5.70(8)         | 0.002     |
|               |           |             |            |           | Mn-Mn        | 4         | 5.83(5)         | 0.002     |
|               |           |             |            |           |              |           |                 |           |
| <u>Sample</u> | <u>e0</u> | <u>focc</u> | <u>S02</u> | <u>χ2</u> | <u>Shell</u> | <u>CN</u> | <u>Dist (Å)</u> | <u>σ2</u> |
| 4 Additions   | 4.08      | 0.7(1)      | 0.71       | 316       | Mn-O         | 4         | 1.87(4)         | 0.009(6)  |
|               |           |             |            |           | Mn-O         | 2         | 1.91(6)         | 0.003(1)  |
|               |           |             |            |           | Mn-Mn        | 2         | 2.72(2)         | 0.005(2)  |
|               |           |             |            |           | Mn-Mn        | 4         | 2.85(1)         | 0.002(1)  |
|               |           |             |            |           | Mn-O         | 4         | 3.35(6)         | 0.006(2)  |
|               |           |             |            |           | Mn-O         | 2         | 3.6(1)          | 0.006(2)  |
|               |           |             |            |           | Mn-Na inter  | 1(2)      | 4.1(1)          | 0.005     |
|               |           |             |            |           | Mn-Mn corn   | 0.2(2)    | 3.48            | 0.003     |
|               |           |             |            |           | Mn-O         | 4         | 4.4(1)          | 0.006(2)  |
|               |           |             |            |           | Mn-O         | 8         | 4.6(1)          | 0.006(2)  |
|               |           |             |            |           | Mn-Mn        | 4         | 4.91(6)         | 0.006(3)  |
|               |           |             |            |           | Mn-Mn        | 2         | 5.3(2)          | 0.006(3)  |
|               |           |             |            |           | Mn-Mn        | 2         | 5.6(1)          | 0.002     |
|               |           |             |            |           |              |           |                 |           |



|               |           |             |            |                      |              |           |                 |                      |
|---------------|-----------|-------------|------------|----------------------|--------------|-----------|-----------------|----------------------|
|               |           |             |            |                      | Mn-Mn        | 4         | 5.83(3)         | 0.002                |
| <b>Sample</b> | <b>e0</b> | <b>focc</b> | <b>S02</b> | <b>χ<sup>2</sup></b> | <b>Shell</b> | <b>CN</b> | <b>Dist (Å)</b> | <b>σ<sup>2</sup></b> |
| 5 Additions   | 5.83      | 0.7(1)      | 0.66       | 841                  | Mn-O         | 4         | 1.87(3)         | 0.011(4)             |
|               |           |             |            |                      | Mn-O         | 2         | 1.91(2)         | 0.001(1)             |
|               |           |             |            |                      | Mn-Mn        | 2         | 2.71(2)         | 0.006(3)             |
|               |           |             |            |                      | Mn-Mn        | 4         | 2.86(1)         | 0.003(1)             |
|               |           |             |            |                      | Mn-O         | 4         | 3.41(6)         | 0.007(4)             |
|               |           |             |            |                      | Mn-O         | 2         | 3.73(9)         | 0.007(4)             |
|               |           |             |            |                      | Mn-Na inter  | 2(3)      | 4.0(1)          | 0.005                |
|               |           |             |            |                      | Mn-Mn corn   | 0.6(3)    | 3.31(5)         | 0.003                |
|               |           |             |            |                      | Mn-O         | 4         | 4.5(1)          | 0.004(3)             |
|               |           |             |            |                      | Mn-O         | 8         | 4.69(9)         | 0.004(3)             |
|               |           |             |            |                      | Mn-Mn        | 4         | 4.91(9)         | 0.005(2)             |
|               |           |             |            |                      | Mn-Mn        | 2         | 5.2(2)          | 0.005(2)             |
|               |           |             |            |                      | Mn-Mn        | 2         | 5.8(2)          | 0.002                |
|               |           |             |            |                      | Mn-Mn        | 4         | 5.8(1)          | 0.002                |
| <b>Sample</b> | <b>e0</b> | <b>focc</b> | <b>S02</b> | <b>χ<sup>2</sup></b> | <b>Shell</b> | <b>CN</b> | <b>Dist (Å)</b> | <b>σ<sup>2</sup></b> |
| 6 Additions   | 6.13      | 0.7(1)      | 0.66       | 695                  | Mn-O         | 4         | 1.87(2)         | 0.007(2)             |
|               |           |             |            |                      | Mn-O         | 2         | 1.91(3)         | 0.002                |
|               |           |             |            |                      | Mn-Mn        | 2         | 2.75(2)         | 0.008(2)             |
|               |           |             |            |                      | Mn-Mn        | 4         | 2.86(1)         | 0.003(1)             |
|               |           |             |            |                      | Mn-O         | 4         | 3.23(4)         | 0.009(3)             |
|               |           |             |            |                      | Mn-O         | 2         | 3.4(1)          | 0.009(3)             |
|               |           |             |            |                      | Mn-Na inter  | 1(3)      | 4.1(1)          | 0.005                |
|               |           |             |            |                      | Mn-Mn corn   | 0.6(2)    | 3.45(3)         | 0.003                |
|               |           |             |            |                      | Mn-O         | 4         | 4.46(5)         | 0.005(3)             |
|               |           |             |            |                      | Mn-O         | 8         | 4.67(3)         | 0.005(3)             |
|               |           |             |            |                      | Mn-Mn        | 4         | 4.91(3)         | 0.005(3)             |
|               |           |             |            |                      | Mn-Mn        | 2         | 5.44(5)         | 0.005(3)             |
|               |           |             |            |                      | Mn-Mn        | 2         | 5.76(4)         | 0.001(1)             |
|               |           |             |            |                      | Mn-Mn        | 4         | 5.86(2)         | 0.001(1)             |
| <b>Sample</b> | <b>e0</b> | <b>focc</b> | <b>S02</b> | <b>χ<sup>2</sup></b> | <b>Shell</b> | <b>CN</b> | <b>Dist (Å)</b> | <b>σ<sup>2</sup></b> |
| 7 Additions   | 6.42      | 0.9(1)      | 0.60       | 337                  | Mn-O         | 4         | 1.86(2)         | 0.006(4)             |
|               |           |             |            |                      | Mn-O         | 2         | 1.93(4)         | 0.002                |
|               |           |             |            |                      | Mn-Mn        | 2         | 2.72(2)         | 0.008(2)             |
|               |           |             |            |                      | Mn-Mn        | 4         | 2.86(1)         | 0.004(1)             |
|               |           |             |            |                      | Mn-O         | 4         | 3.38(3)         | 0.007(2)             |
|               |           |             |            |                      | Mn-O         | 2         | 3.68(9)         | 0.007(2)             |
|               |           |             |            |                      | Mn-Na inter  | 0(2)      | 4.0(2)          | 0.005                |
|               |           |             |            |                      | Mn-Mn corn   | 0.4(3)    | 3.49(4)         | 0.003                |
|               |           |             |            |                      | Mn-O         | 4         | 4.49(5)         | 0.001(1)             |
|               |           |             |            |                      | Mn-O         | 8         | 4.71(3)         | 0.001(1)             |
|               |           |             |            |                      | Mn-Mn        | 4         | 4.94(2)         | 0.004(1)             |
|               |           |             |            |                      | Mn-Mn        | 2         | 5.19(5)         | 0.004(1)             |
|               |           |             |            |                      | Mn-Mn        | 2         | 5.76(4)         | 0.002(1)             |
|               |           |             |            |                      | Mn-Mn        | 4         | 5.85(2)         | 0.002(1)             |
| <b>Sample</b> | <b>e0</b> | <b>focc</b> | <b>S02</b> | <b>χ<sup>2</sup></b> | <b>Shell</b> | <b>CN</b> | <b>Dist (Å)</b> | <b>σ<sup>2</sup></b> |
| 8 Additions   | 6.20      | 0.7(1)      | 0.66       | 299                  | Mn-O         | 4         | 1.86(1)         | 0.005(2)             |
|               |           |             |            |                      | Mn-O         | 2         | 1.94(3)         | 0.002                |
|               |           |             |            |                      | Mn-Mn        | 2         | 2.70(3)         | 0.007(2)             |
|               |           |             |            |                      | Mn-Mn        | 4         | 2.85(1)         | 0.002(1)             |
|               |           |             |            |                      | Mn-O         | 4         | 3.30(4)         | 0.003(3)             |
|               |           |             |            |                      | Mn-O         | 2         | 3.57(4)         | 0.003(3)             |
|               |           |             |            |                      | Mn-Na inter  | 0(2)      | 4.10            | 0.005                |
|               |           |             |            |                      | Mn-Mn corn   | 0.7(3)    | 3.49(7)         | 0.003                |
|               |           |             |            |                      | Mn-O         | 4         | 4.50(7)         | 0.002(4)             |
|               |           |             |            |                      | Mn-O         | 8         | 4.70(5)         | 0.002(4)             |
|               |           |             |            |                      | Mn-Mn        | 4         | 4.92(5)         | 0.004(2)             |
|               |           |             |            |                      | Mn-Mn        | 2         | 5.26(9)         | 0.004(2)             |

|               |           |             |            |           |              |           |                 |           |
|---------------|-----------|-------------|------------|-----------|--------------|-----------|-----------------|-----------|
|               |           |             |            |           | Mn-Mn        | 2         | 5.81(7)         | 0.002(2)  |
|               |           |             |            |           | Mn-Mn        | 4         | 5.85(4)         | 0.002(2)  |
| <u>Sample</u> | <u>e0</u> | <u>focc</u> | <u>S02</u> | <u>χ2</u> | <u>Shell</u> | <u>CN</u> | <u>Dist (Å)</u> | <u>σ2</u> |
| 9 Additions   | 5.35      | 0.9(1)      | 0.66       | 449       | Mn-O         | 4         | 1.86(2)         | 0.006(4)  |
|               |           |             |            |           | Mn-O         | 2         | 1.91(4)         | 0.002     |
|               |           |             |            |           | Mn-Mn        | 2         | 2.73(3)         | 0.010(3)  |
|               |           |             |            |           | Mn-Mn        | 4         | 2.85(1)         | 0.004(1)  |
|               |           |             |            |           | Mn-O         | 4         | 3.22(6)         | 0.014(8)  |
|               |           |             |            |           | Mn-O         | 2         | 3.5(1)          | 0.014(8)  |
|               |           |             |            |           | Mn-Na inter  | 1(2)      | 4.1(1)          | 0.005     |
|               |           |             |            |           | Mn-Mn corn   | 0.6(2)    | 3.43(4)         | 0.003     |
|               |           |             |            |           | Mn-O         | 4         | 4.42(9)         | 0.009(6)  |
|               |           |             |            |           | Mn-O         | 8         | 4.64(6)         | 0.009(6)  |
|               |           |             |            |           | Mn-Mn        | 4         | 4.91(5)         | 0.010(3)  |
|               |           |             |            |           | Mn-Mn        | 2         | 5.3(1)          | 0.010(3)  |
|               |           |             |            |           | Mn-Mn        | 2         | 5.76(4)         | 0.003(2)  |
|               |           |             |            |           | Mn-Mn        | 4         | 5.85(3)         | 0.003(2)  |
| <u>Sample</u> | <u>e0</u> | <u>focc</u> | <u>S02</u> | <u>χ2</u> | <u>Shell</u> | <u>CN</u> | <u>Dist (Å)</u> | <u>σ2</u> |
| 10 Additions  | 6.08      | 0.7(1)      | 0.66       | 421       | Mn-O         | 4         | 1.86(3)         | 0.009(4)  |
|               |           |             |            |           | Mn-O         | 2         | 1.92(3)         | 0.002     |
|               |           |             |            |           | Mn-Mn        | 2         | 2.71(2)         | 0.006(3)  |
|               |           |             |            |           | Mn-Mn        | 4         | 2.85(1)         | 0.002(1)  |
|               |           |             |            |           | Mn-O         | 4         | 3.31(6)         | 0.005(3)  |
|               |           |             |            |           | Mn-O         | 2         | 3.60(7)         | 0.005(3)  |
|               |           |             |            |           | Mn-Na inter  | 1(3)      | 4.1(1)          | 0.005     |
|               |           |             |            |           | Mn-Mn corn   | 0.9(3)    | 3.53(7)         | 0.003     |
|               |           |             |            |           | Mn-O         | 4         | 4.46(9)         | 0.007(7)  |
|               |           |             |            |           | Mn-O         | 8         | 4.68(8)         | 0.007(7)  |
|               |           |             |            |           | Mn-Mn        | 4         | 4.92(6)         | 0.008(4)  |
|               |           |             |            |           | Mn-Mn        | 2         | 5.29(9)         | 0.008(4)  |
|               |           |             |            |           | Mn-Mn        | 2         | 5.75(4)         | 0.006(2)  |
|               |           |             |            |           | Mn-Mn        | 4         | 5.84(2)         | 0.006(2)  |
| <u>Sample</u> | <u>e0</u> | <u>focc</u> | <u>S02</u> | <u>χ2</u> | <u>Shell</u> | <u>CN</u> | <u>Dist (Å)</u> | <u>σ2</u> |
| 11 Additions  | 6.23      | 0.8(1)      | 0.66       | 514       | Mn-O         | 4         | 1.86(1)         | 0.005(2)  |
|               |           |             |            |           | Mn-O         | 2         | 1.93(2)         | 0.002     |
|               |           |             |            |           | Mn-Mn        | 2         | 2.72(1)         | 0.007(2)  |
|               |           |             |            |           | Mn-Mn        | 4         | 2.86(1)         | 0.003(1)  |
|               |           |             |            |           | Mn-O         | 4         | 3.33(3)         | 0.004(2)  |
|               |           |             |            |           | Mn-O         | 2         | 3.64(4)         | 0.004(2)  |
|               |           |             |            |           |              | 0.37 ±    |                 |           |
|               |           |             |            |           | Mn-Na inter  | 1.11      | 4.1(1)          | 0.005     |
|               |           |             |            |           | Mn-Mn corn   | 1.1(3)    | 3.52(2)         | 0.003     |
|               |           |             |            |           | Mn-O         | 4         | 4.23(3)         | 0.013(6)  |
|               |           |             |            |           | Mn-O         | 8         | 4.56(5)         | 0.013(6)  |
|               |           |             |            |           | Mn-Mn        | 4         | 4.88(4)         | 0.008(3)  |
|               |           |             |            |           | Mn-Mn        | 2         | 5.29(9)         | 0.008(3)  |
|               |           |             |            |           | Mn-Mn        | 2         | 5.82(3)         | 0.003(1)  |
|               |           |             |            |           | Mn-Mn        | 4         | 5.83(9)         | 0.003(1)  |
| <u>Sample</u> | <u>e0</u> | <u>focc</u> | <u>S02</u> | <u>χ2</u> | <u>Shell</u> | <u>CN</u> | <u>Dist (Å)</u> | <u>σ2</u> |
| 12 Additions  | 5.76      | 0.7(1)      | 0.66       | 379       | Mn-O         | 4         | 1.87(2)         | 0.008(3)  |
|               |           |             |            |           | Mn-O         | 2         | 1.91(3)         | 0.002     |
|               |           |             |            |           | Mn-Mn        | 2         | 2.72(2)         | 0.008(2)  |
|               |           |             |            |           | Mn-Mn        | 4         | 2.85(1)         | 0.003(1)  |
|               |           |             |            |           | Mn-O         | 4         | 3.29(7)         | 0.003(2)  |
|               |           |             |            |           | Mn-O         | 2         | 3.62(3)         | 0.003(2)  |
|               |           |             |            |           | Mn-Na inter  | 1(2)      | 4.1(1)          | 0.005     |
|               |           |             |            |           | Mn-Mn corn   | 1.3(2)    | 3.49(2)         | 0.003     |
|               |           |             |            |           | Mn-O         | 4         | 4.48(8)         | 0.004(5)  |
|               |           |             |            |           | Mn-O         | 8         | 4.70(4)         | 0.004(5)  |

|       |   |         |          |
|-------|---|---------|----------|
| Mn-Mn | 4 | 4.94(4) | 0.004(2) |
| Mn-Mn | 2 | 5.22(6) | 0.004(2) |
| Mn-Mn | 2 | 5.79(5) | 0.002(1) |
| Mn-Mn | 4 | 5.85(3) | 0.002(1) |

272

273

274

275

276

## 277   **References**

- 278   (1) Nakamura, S.; Tezuka, Y.; Ushiyama, A.; Kawashima, C.; Kitagawara, Y.; Takahashi, K.;  
279       Ohta, S.; Mashino, T. Ipso substitution of bisphenol A catalyzed by microsomal  
280       cytochrome P450 and enhancement of estrogenic activity. *Toxicol. Lett.* **2011**, *203* (1), 92–  
281       95.
- 282   (2) Im, J.; Prevatte, C. W.; Campagna, S. R.; Löffler, F. E. Identification of 4-hydroxycumyl  
283       alcohol as the major MnO<sub>2</sub>-mediated bisphenol A transformation product and evaluation of  
284       its environmental fate. *Environ. Sci. Technol.* **2015**, *49* (10), 6214–6221.  
285
